# Supplementary material for: Phosphorus transformations as a function of pedogenesis: A synthesis of soil phosphorus data using Hedley fractionation method
Source: Copernicus journal article supplement (doi:10.5194/bg-8-2907-2011), 2011-10-17
Supplement: Supplementary file 1 [file References_HedleyPdatabase.pdf › Supplementary/References_HedleyPdatabase.pdf]

## Reference:

- Araújo, M., C. Schaefer, and E. Sampaio (2004), Soil phosphorus fractions from toposequences of semi-arid Latosols and Luvisols in northeastern Brazil, *Geoderma*, 119(3-4), 309-321.
- Beck, M., and H. Elsenbeer (1999), Biogeochemical cycles of soil phosphorus in southern Alpine spodosols, *Geoderma*, 91(3-4), 249-260.
- Campbell, C., M. Schnitzer, J. Stewart, V. Biederbeck, and F. Selles (1986), Effect of manure and P fertilizer on properties of a Black Chernozem in southern Saskatchewan, *Canadian journal of soil science*, 66(4), 601-614.
- Cassagne, N., M. Remaury, T. Gauquelin, and A. Fabre (2000), Forms and profile distribution of soil phosphorus in alpine Inceptisols and Spodosols (Pyrenees, France), *Geoderma*, 95(1-2), 161-172.
- Cross, A. F., and W. H. Schlesinger (2001), Biological and geochemical controls on phosphorus fractions in semiarid soils, *Biogeochemistry*, 52(2), 155-172.
- Duffera, M., and W. Robarge (1996), Characterization of organic and inorganic phosphorus in the highland plateau soils of Ethiopia, *Communications in Soil Science and Plant Analysis*, 27(15), 2799-2814.
- Lajtha, K., and W. H. Schlesinger (1988), The biogeochemistry of phosphorus cycling and phosphorus availability along a desert soil chronosequence, *Ecology*, 69(1), 24-39.
- Lee, D., X. Han, and C. Jordan (1990), Soil phosphorus fractions, aluminum, and water retention as affected by microbial activity in an Ultisol, *Plant and Soil*, 121(1), 125-136.
- Levy, E. T., and W. H. Schlesinger (1999), A comparison of fractionation methods for forms of phosphorus in soils, *Biogeochemistry*, 47(1), 25-38.

- Lilienfein, J., W. Wilcke, M. A. Ayarza, L. Vilela, S. do Carmo Lima, and W. Zech (2000), Chemical fractionation of phosphorus, sulphur, and molybdenum in Brazilian savannah Oxisols under different land use, *Geoderma*, 96(1-2), 31-46.
- McKenzie, R., J. Stewart, J. Dormaar, and G. Schaalje (1992a), Long-term crop rotation and fertilizer effects on phosphorus transformations: I. In a Chernozemic soil, *Canadian journal of soil science*, 72, 569-569.
- McKenzie, R., J. Stewart, J. Dormaar, and G. Schaalje (1992b), Long-term crop rotation and fertilizer effects on phosphorus transformations. II. In a Luvisolic soil, *Canadian journal of soil science (Canada)*.
- Oíhalloran, I., J. W. B. Stewart, and E. De Jong (1987), Changes in P forms and availability as influenced by management practices, *Plant and Soil*, 100(1), 113-126.
- Pare, D., and B. Bernier (1989), Origin of the phosphorus deficiency observed in declining sugar maple stands in the Quebec Appalachians, *Canadian journal of forest research*, 19(1), 24-34.
- Quesada, C., J. Lloyd, M. Schwarz, S. Patino, T. Baker, C. Czimczik, N. Fyllas, L. Martinelli, G. Nardoto, and J. Schmerler (2010), Variations in chemical and physical properties of Amazon forest soils in relation to their genesis, *Biogeosciences*, 7, 1515-1541.
- Redel, Y., R. Rubio, R. Godoy, and F. Borie (2008), Phosphorus fractions and phosphatase activity in an Andisol under different forest ecosystems, *Geoderma*, 145(3-4), 216-221.
- Richter, D. D., H. L. Allen, J. Li, D. Markewitz, and J. Raikes (2006), Bioavailability of slowly cycling soil phosphorus: major restructuring of soil P fractions over four decades in an aggrading forest, *Oecologia*, 150(2), 259-271.
- Roberts, T., J. Stewart, and J. Bettany (1985), The influence of topography on the distribution of organic and inorganic soil phosphorus across a narrow environmental gradient, *Canadian journal of soil science*, 65(4), 651-665.

- Sattell, R., and R. Morris (1992), Phosphorus fractions and availability in Sri Lankan Alfisols, *Soil Science Society of America journal (USA)*.
- Satti, P., M. Mazzarino, L. Roselli, and P. Crego (2007), Factors affecting soil P dynamics in temperate volcanic soils of southern Argentina, *Geoderma*, 139(1-2), 229-240.
- Schlesinger, W. H., L. Bruijnzeel, M. B. Bush, E. M. Klein, K. A. Mace, J. A. Raikes, and R. Whittaker (1998), The biogeochemistry of phosphorus after the first century of soil development on Rakata Island, Krakatau, Indonesia, *Biogeochemistry*, 40(1), 37-55.
- Schlichting, A., P. Leinweber, R. Meissner, and M. Altermann (2002), Sequentially extracted phosphorus fractions in peat derived soils, *Journal of Plant Nutrition and Soil Science*, 165(3), 290-298.
- Schoenau, J., J. Stewart, and J. Bettany (1989), Forms and cycling of phosphorus in prairie and boreal forest soils, *Biogeochemistry*, 8(3), 223-237.
- Sharpley, A. N., C. Jones, C. Gray, C. Cole, H. Tiessen, and C. Holzhey (1985), A detailed phosphorus characterization of seventy-eight soils. USDA Agricultural Research Service, ARS-31
- Thomas, S. M., A. H. Johnson, J. Frizano, D. R. Vann, D. J. Zarin, and A. Joshi (1999), Phosphorus fractions in montane forest soils of the Cordillera de PiuchuÈ, Chile: biogeochemical implications, *Plant and Soil*, 211(2), 139-148.
- Trasar-Cepeda, M., F. Gil-Sotres, and F. Guitian-Ojea (1990), Relation between phosphorus fractions and development of soils from Galicia (NW Spain), *Geoderma*, 47(1-2), 139-150.
- Trasar-Cepeda, M. C., T. Carballas, F. Gil-Sotres, and E. De Blas (1991), Liming and the phosphatase activity and mineralization of phosphorus in an andic soil, *Soil Biology and Biochemistry*, 23(3), 209-215.

Wagar, B., J. Stewart, and J. Moir (1986), Changes with time in the form and availability of residual fertilizer phosphorus on Chernozemic soils, *Canadian journal of soil science*, 66(1), 105-119.

Yang, J. E., and J. S. Jacobsen (1990), Soil inorganic phosphorus fractions and their uptake relationships in calcareous soils, *Soil Science Society of America Journal*, 54(6), 1666-1669.
